# Supplementary material for: Differential pulse stripping voltammetric determination of the antipsychotic medication olanzapine at a magnetic nano-composite with a core/shell structure
Source: Royal Society of Chemistry journal article supplement (doi:10.1039/c5ra00061k), 2015-01-01
Supplement: c5ra00061k1.pdf [file c5ra00061k1.pdf]

# **Differential pulse stripping voltammetric determination of the antipsychotic medication olanzapine at a magnetic nano-composite with a core-shell structure**

**Majid Arvand\*, Setareh Orangpour and Navid Ghodsi**

*Electroanalytical Chemistry Laboratory, Faculty of Chemistry, University of Guilan, Namjoo Street, P.O. Box: 1914, Rasht, Iran*

\*Corresponding author:

Tel.: +98131 3233262, fax: +98 131 3233262

*E-mail address:* [arvand@guilan.ac.ir](mailto:arvand@guilan.ac.ir) (M. Arvand)

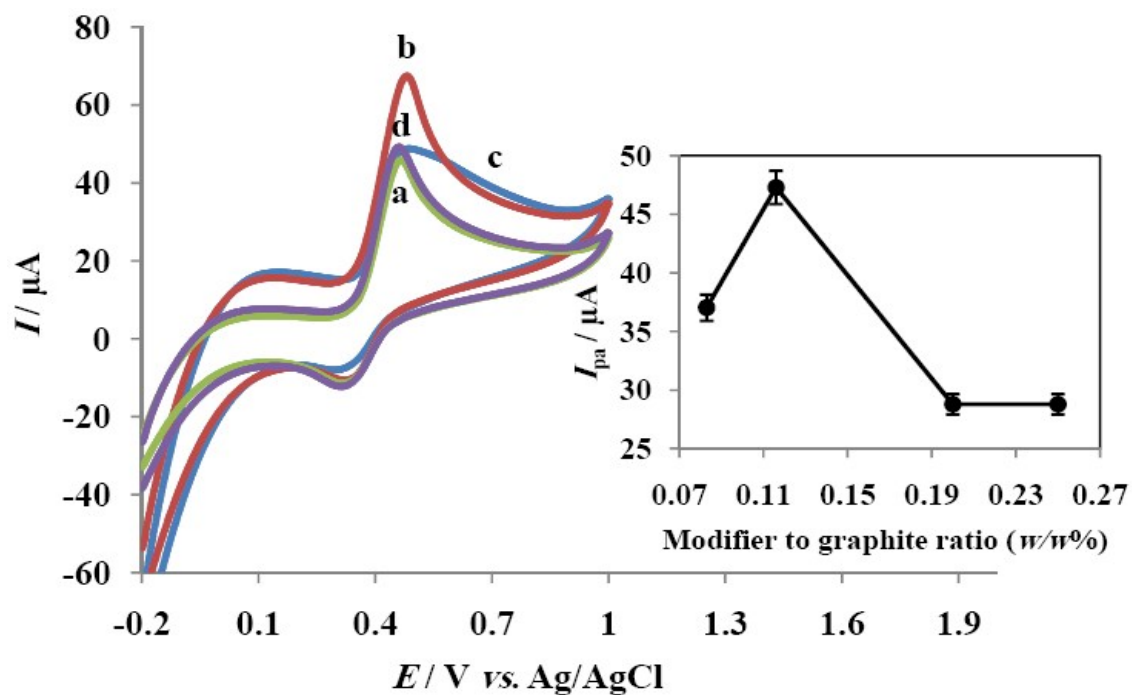

**Figure S1** Cyclic voltammograms of (a) 0.083, (b) 0.12, (c) 0.21 and (d) 0.25% (w/w) modifier to graphite in  $5 \mu\text{mol L}^{-1}$  OLZ solution (pH 4.3). Inset: anodic peak current vs. ratio of modifier to graphite in a solution of  $5 \mu\text{mol L}^{-1}$  OLZ (pH 4.3).

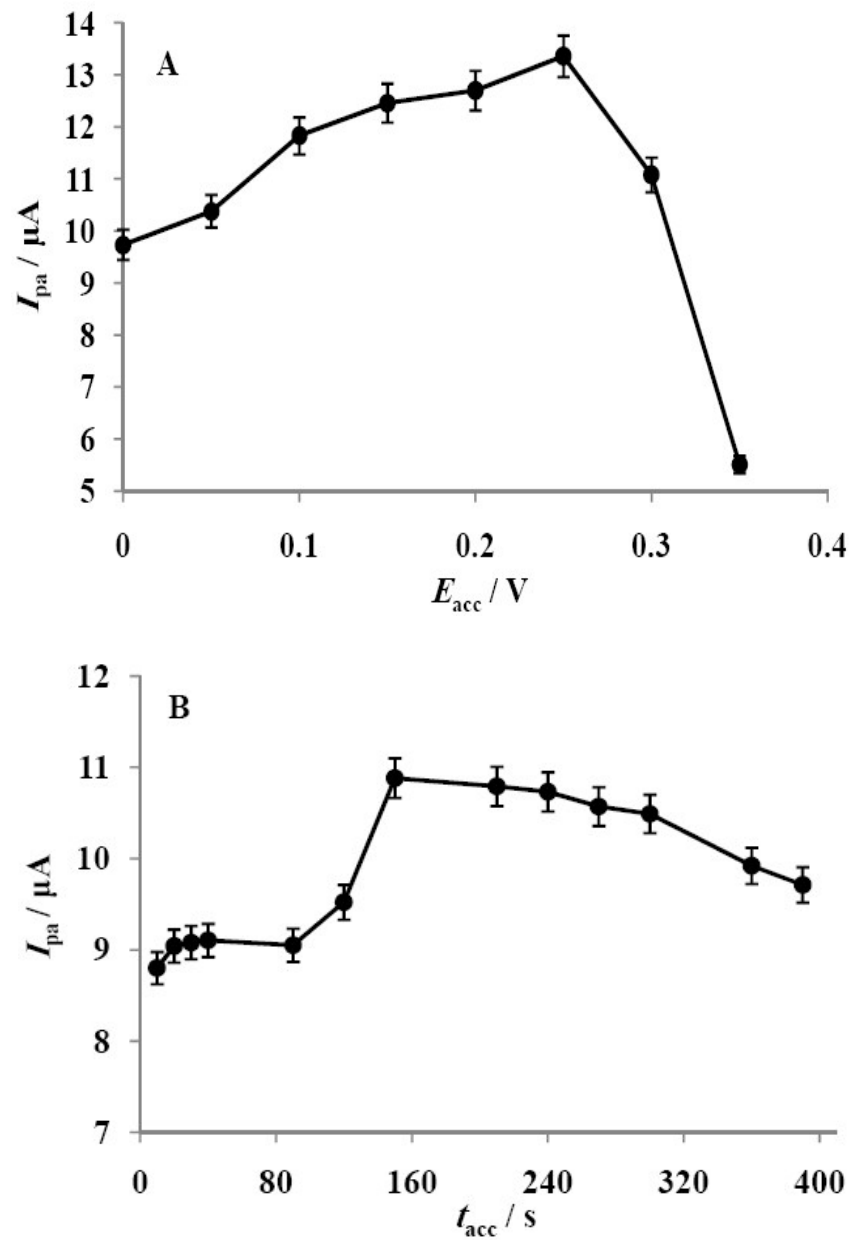

**Figure S2** Anodic peak current vs. (A) accumulation potential and (B) accumulation time in 5  $\mu\text{mol L}^{-1}$  OLZ solution (pH 4.3).

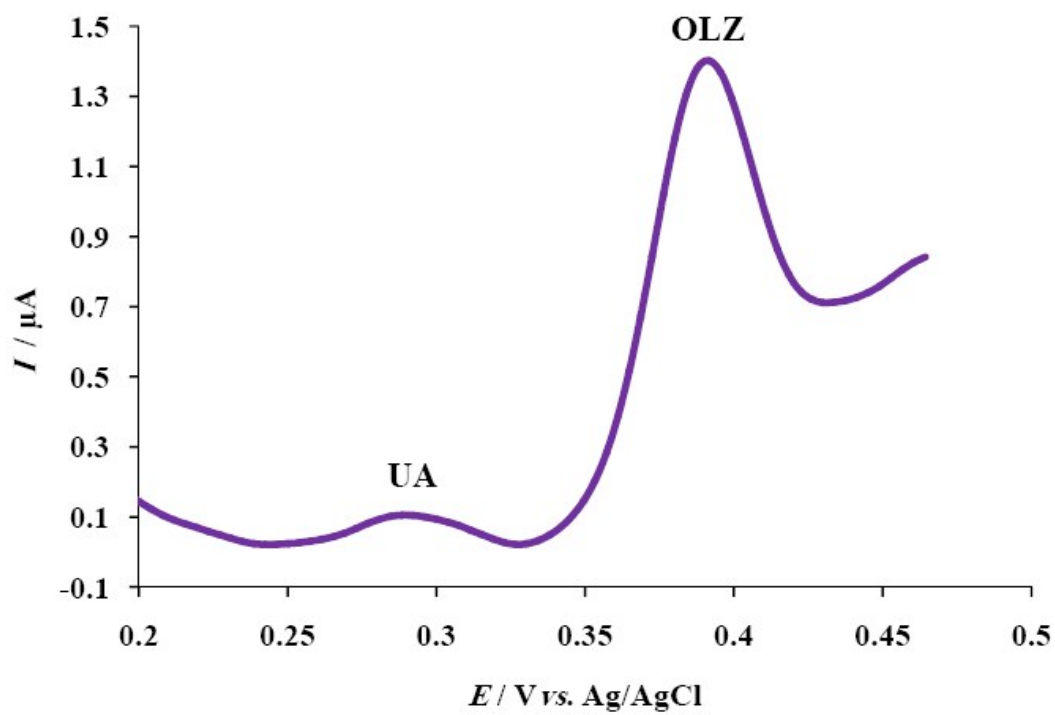

**Figure S3** DPV obtained at the  $\text{Fe}_3\text{O}_4@\text{Ag}/\text{CPE}$  in  $0.1 \text{ mol L}^{-1}$  acetate buffer (pH 4.3) for a sample with known concentrations of OLZ ( $7.4 \text{ }\mu\text{mol L}^{-1}$ ) and UA ( $7.4 \text{ }\mu\text{mol L}^{-1}$ ). Other conditions were as for Fig. 7.

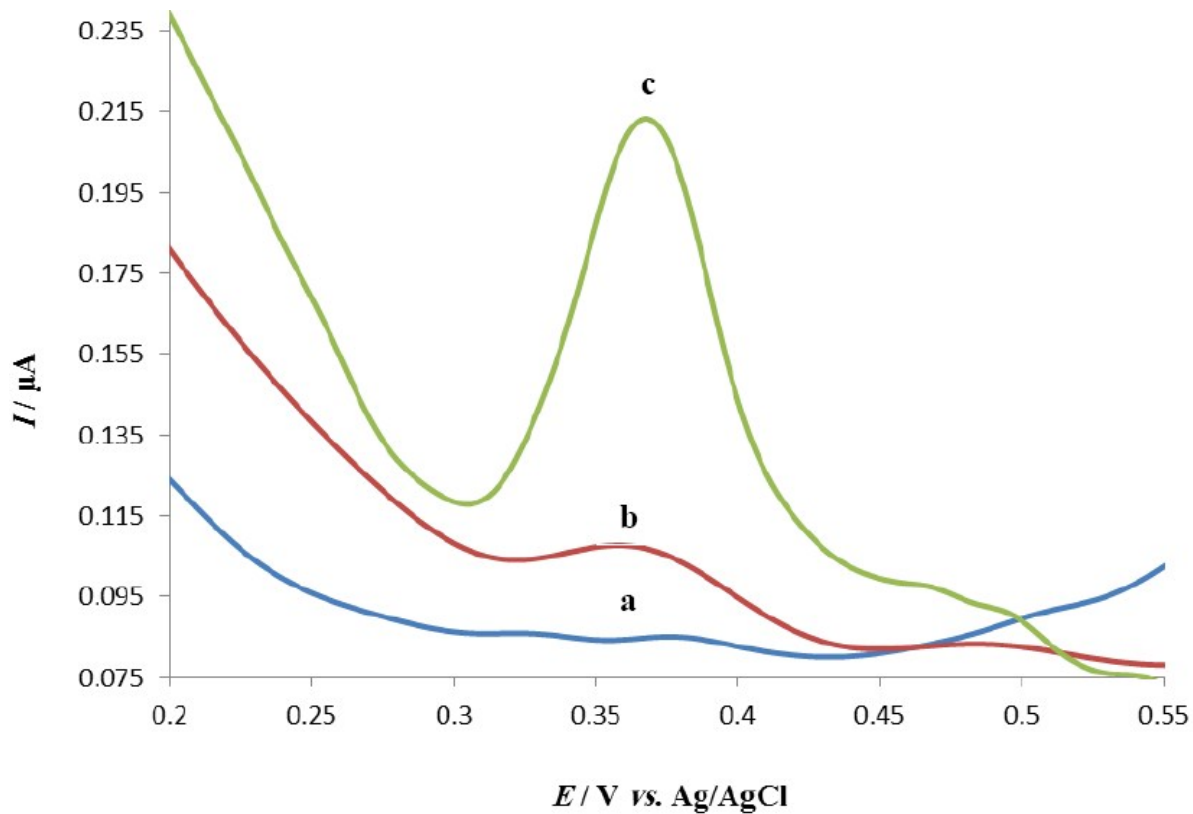

**Figure S4** DPVs obtained for the oxidation of OLZ at the surface of  $\text{Fe}_3\text{O}_4@\text{Ag}|\text{CPE}$  in serum of schizophrenia patient: (a) blank, (b) a +  $1.38 \mu\text{mol L}^{-1}$  OLZ and (c) a +  $9.98 \mu\text{mol L}^{-1}$  OLZ.
